# Supplementary material for: Preparation of polystyrene–polyolefin multiblock copolymers by sequential coordination and anionic polymerization
Source: Royal Society of Chemistry journal article supplement (doi:10.1039/c6ra25848d), 2017-01-01

## Supporting Information

# Preparation of Polystyrene-Polyolefin Multiblock Copolymers by Sequential Coordination and Anionic Polymerization

*Dong Hyun Kim, Seung Soo Park, Su Hyun Park, Jong Yeob Jeon, Hyo Bo Kim, and Bun  
Yeoul Lee\**

<sup>a</sup>Department of Molecular Science and Technology, Ajou University, Suwon 443-749 South  
Korea; Email: bunyeoul@ajou.ac.kr; Tel: 82-31-219-1844

<<sup>1</sup>H NMR spectrum of [4-(isopropenyl)benzyl]<sub>2</sub>Zn>  
(The signal marked with “\*” is the solvent signal)

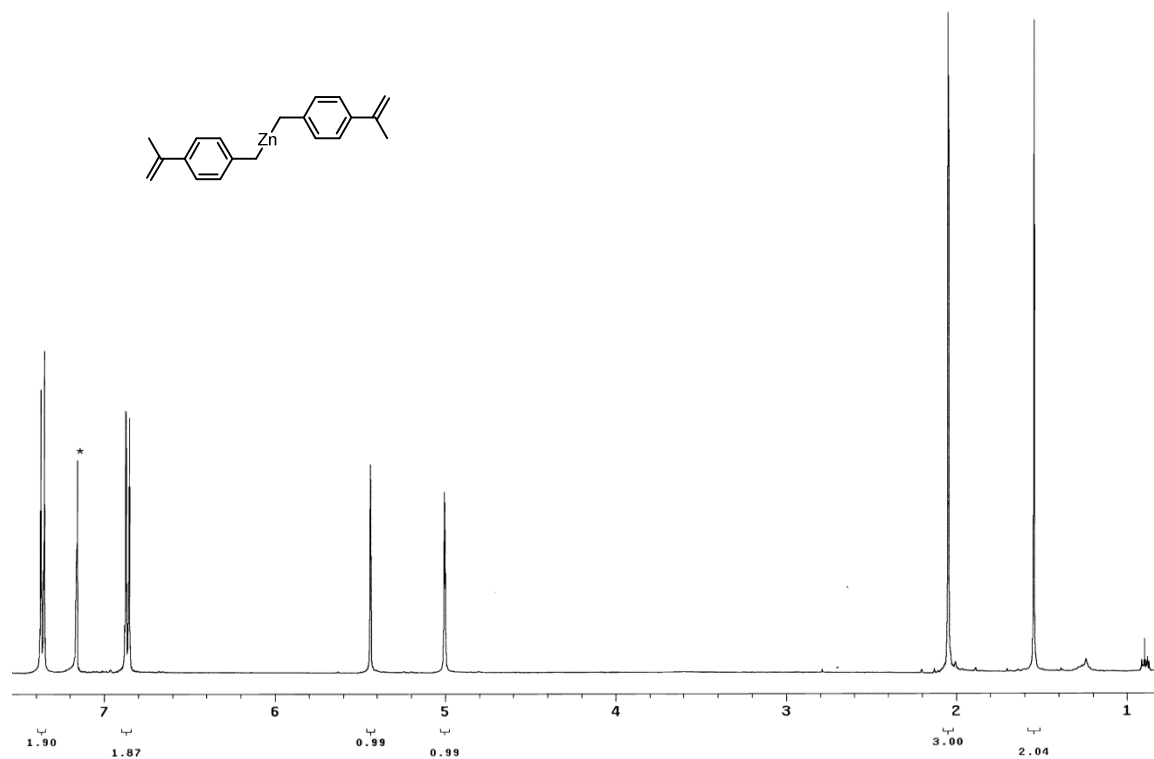

<<sup>13</sup>C NMR spectrum of [4-(isopropenyl)benzyl]<sub>2</sub>Zn>  
(The signal marked with “\*” is the solvent signal)

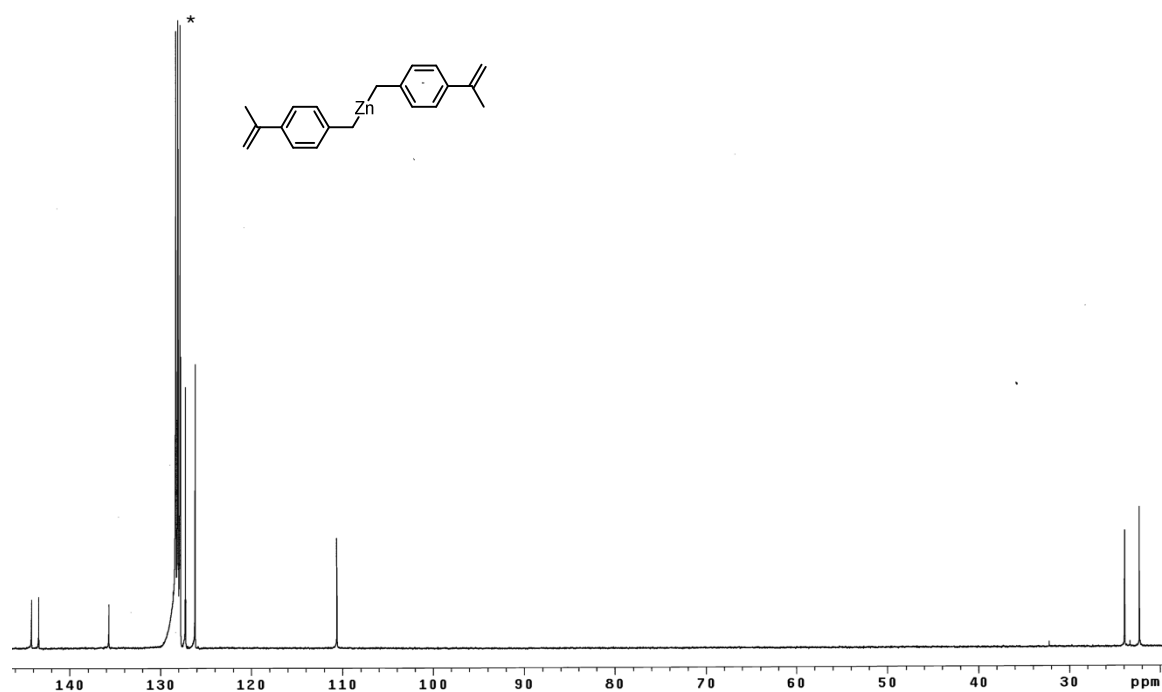

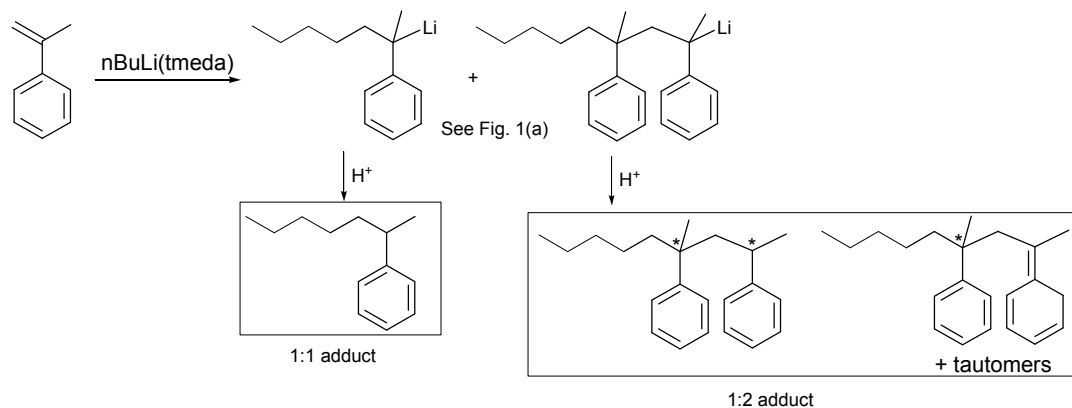

The 1:1 adduct and 1:2 adduct were separated by column chromatography on silica gel eluting with hexane

<Mass spectrum of the protonated compound of 1:1 adduct n-Bu-CH<sub>2</sub>C(Ph)(Me)Li>

HRMS (EI): *m/z* calcd ([M]<sup>+</sup> C<sub>13</sub>H<sub>20</sub>) 176.1565. Found: 176.1562.

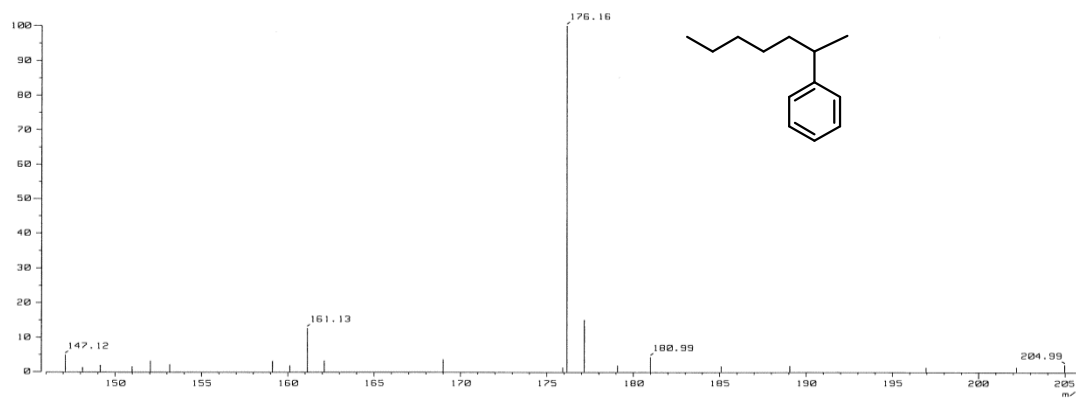

<<sup>1</sup>H NMR spectrum of the protonated compound of 1:1 adduct n-Bu-CH<sub>2</sub>C(Ph)(Me)Li>

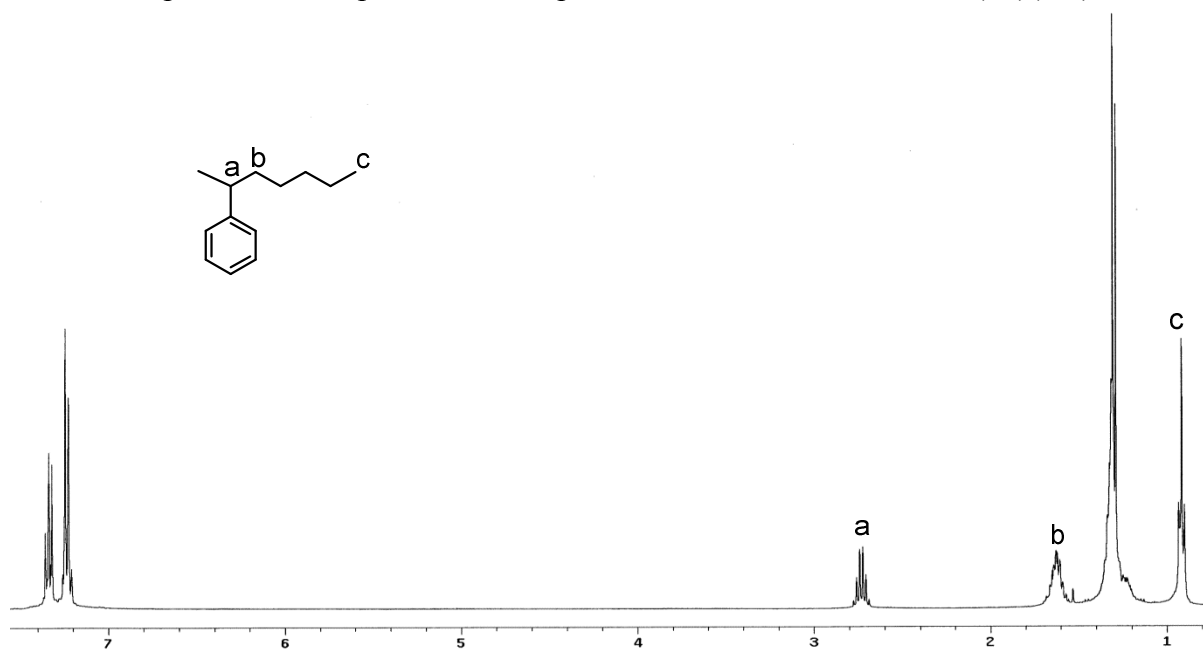

<Mass spectrum of the protonated compound of 1:2 adduct nBu-CH<sub>2</sub>C(Ph)(Me)-CH<sub>2</sub>C(Ph)(Me)Li>

HRMS (EI): *m/z* calcd ([M]<sup>+</sup> C<sub>22</sub>H<sub>30</sub>) 294.2348. Found: 294.2350.

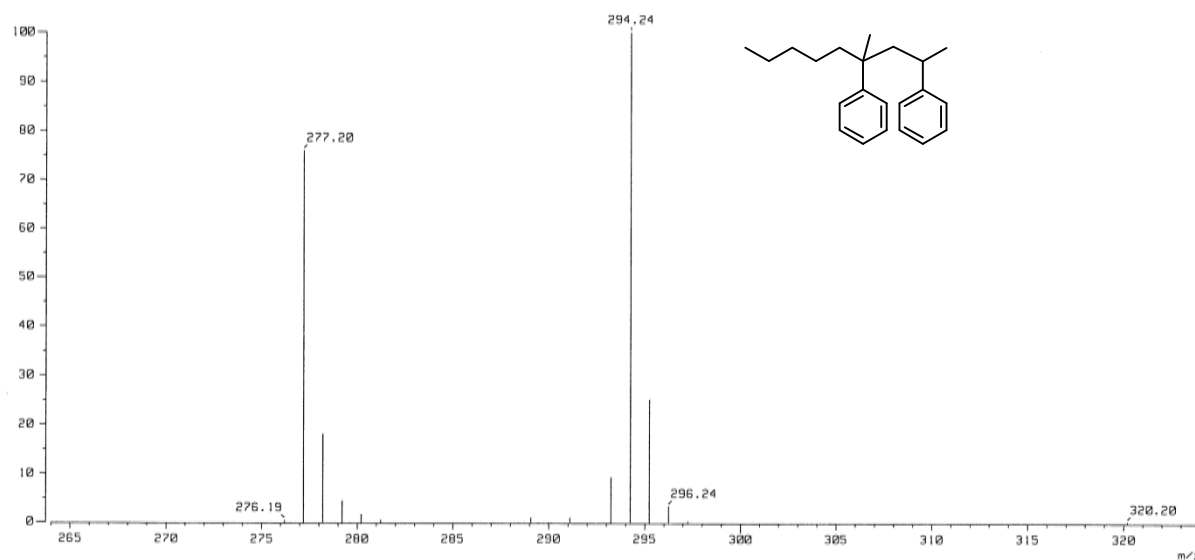

<<sup>1</sup>H NMR spectrum of the protonated compound of 1:2 adduct nBu-CH<sub>2</sub>C(Ph)(Me)-CH<sub>2</sub>C(Ph)(Me)Li>

The upper spectrum was measured in C<sub>6</sub>D<sub>6</sub> while the lower one measured in CDCl<sub>3</sub>.

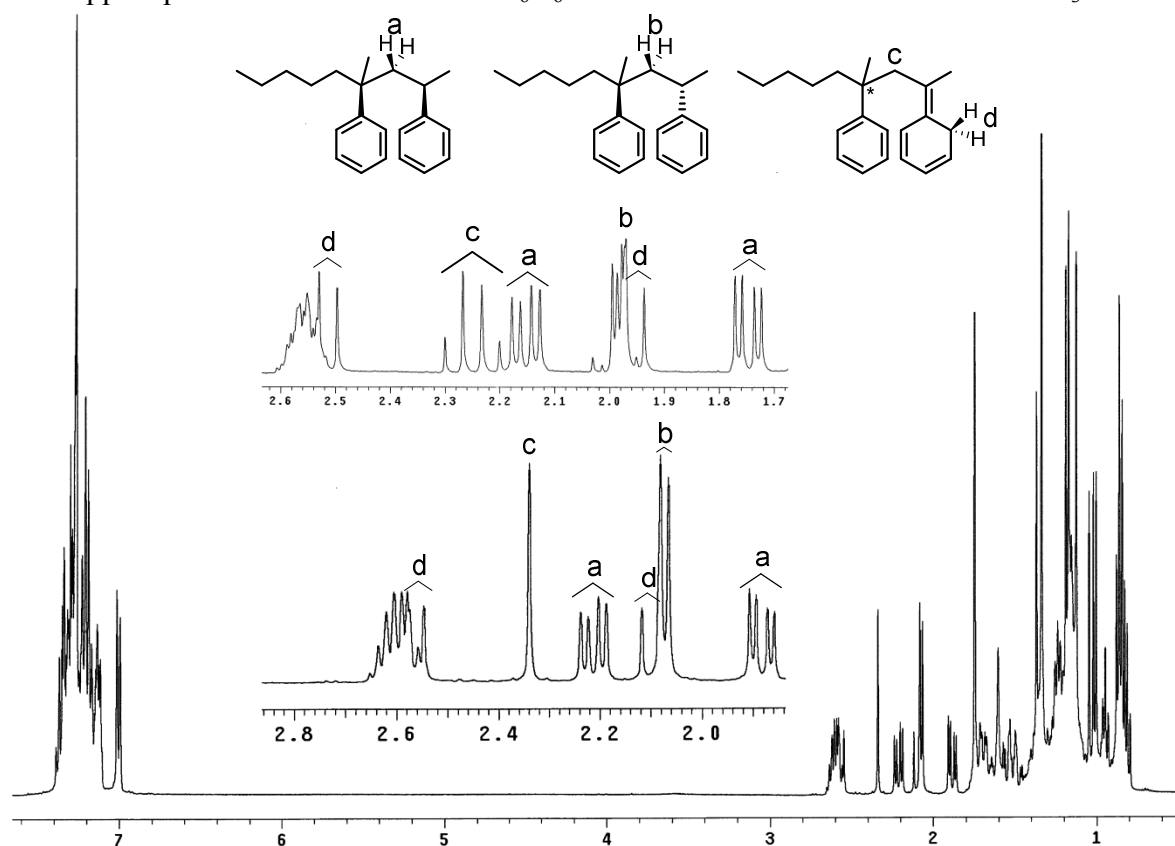

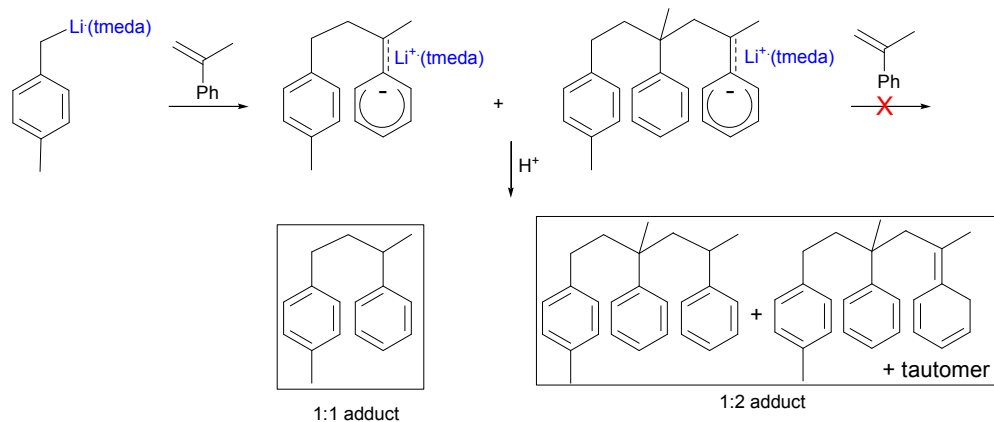

The 1:1 adduct and 1:2 adduct were separated by column chromatography on silica gel eluting with hexane

$^1\text{H}$  NMR spectrum of the protonated compound of 1:1 adduct  $\text{MeC}_6\text{H}_4\text{CH}_2\text{-CH}_2\text{C(Ph)(Me)Li}$

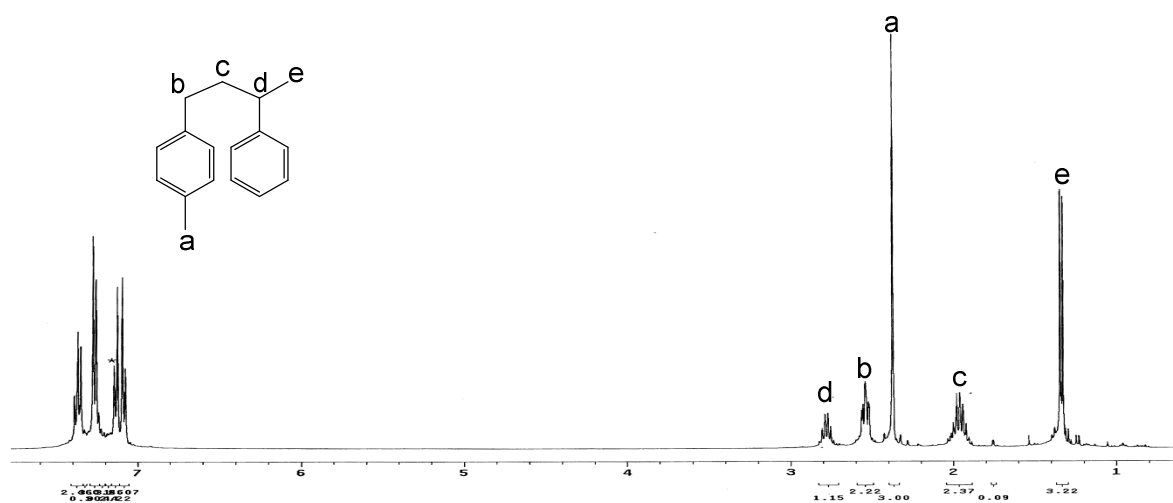

$^{13}\text{C}$  NMR spectrum of the protonated compound of 1:1 adduct  $\text{MeC}_6\text{H}_4\text{CH}_2\text{-CH}_2\text{C(Ph)(Me)Li}$

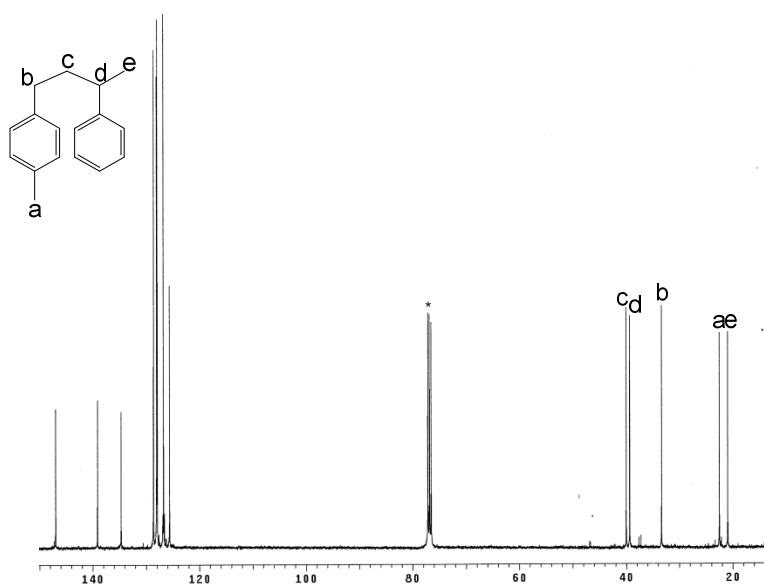

<Mass spectrum of the protonated compound of 1:1 adduct MeC<sub>6</sub>H<sub>4</sub>CH<sub>2</sub>-CH<sub>2</sub>C(Ph)(Me)>  
HRMS (EI): *m/z* calcd ([M]<sup>+</sup> C<sub>17</sub>H<sub>20</sub>) 224.1565. Found: 224.1562.

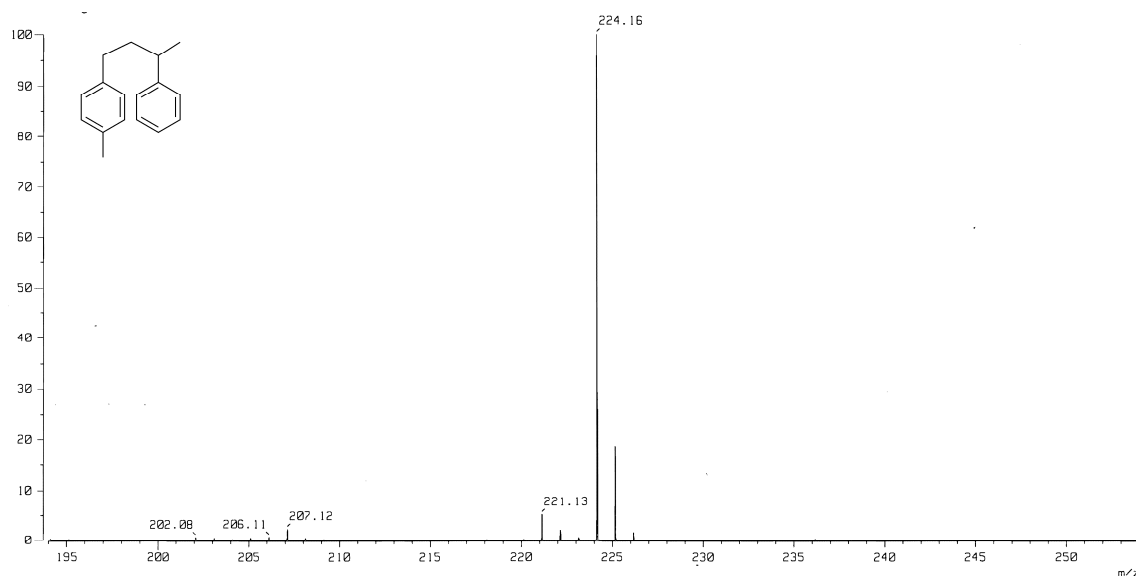

<Mass spectrum of the protonated compound of 1:2 adduct MeC<sub>6</sub>H<sub>4</sub>CH<sub>2</sub>-CH<sub>2</sub>C(Ph)(Me)-  
CH<sub>2</sub>C(Ph)(Me)Li>  
HRMS (EI): *m/z* calcd ([M]<sup>+</sup> C<sub>26</sub>H<sub>30</sub>) 342.2348. Found: 342.2350.

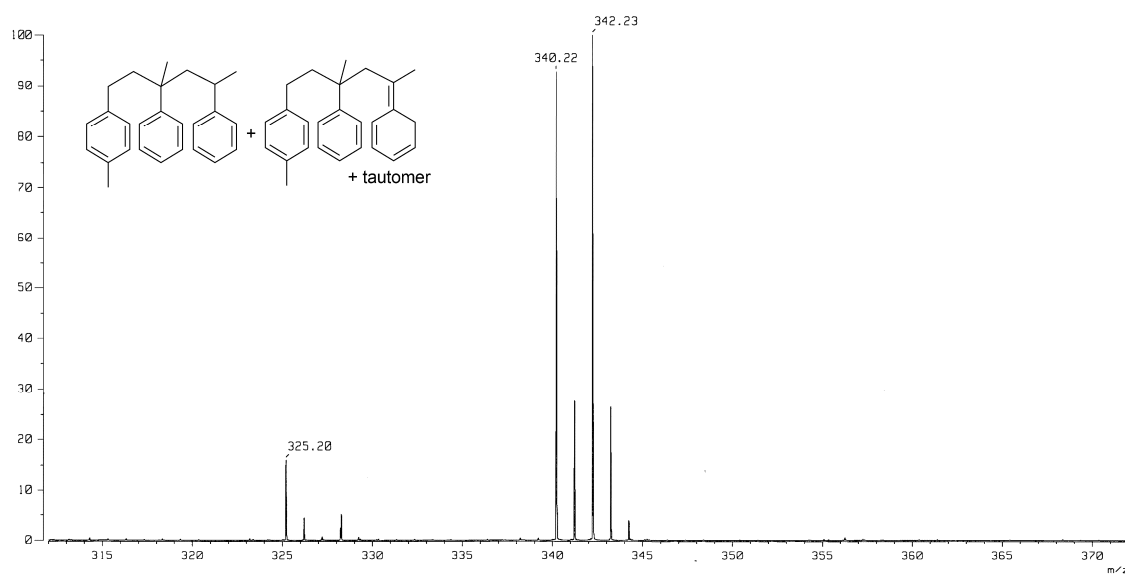

<  $^1\text{H}$ - $^1\text{H}$  COSY and  $^1\text{H}$ - $^{13}\text{C}$  HMQC spectra of the protonated compound of 1:2 adduct  
 $\text{MeC}_6\text{H}_4\text{CH}_2\text{-CH}_2\text{C(Ph)(Me)-CH}_2\text{C(Ph)(Me)Li}$ >

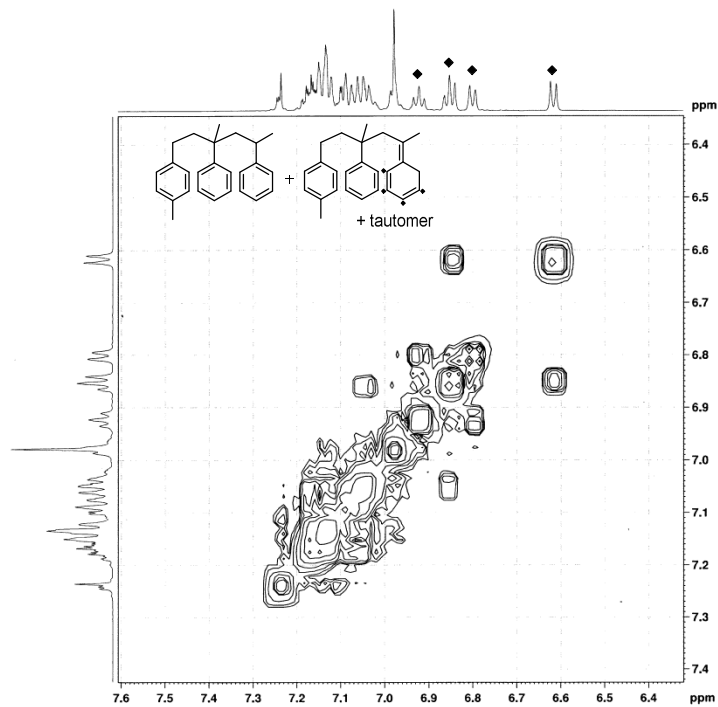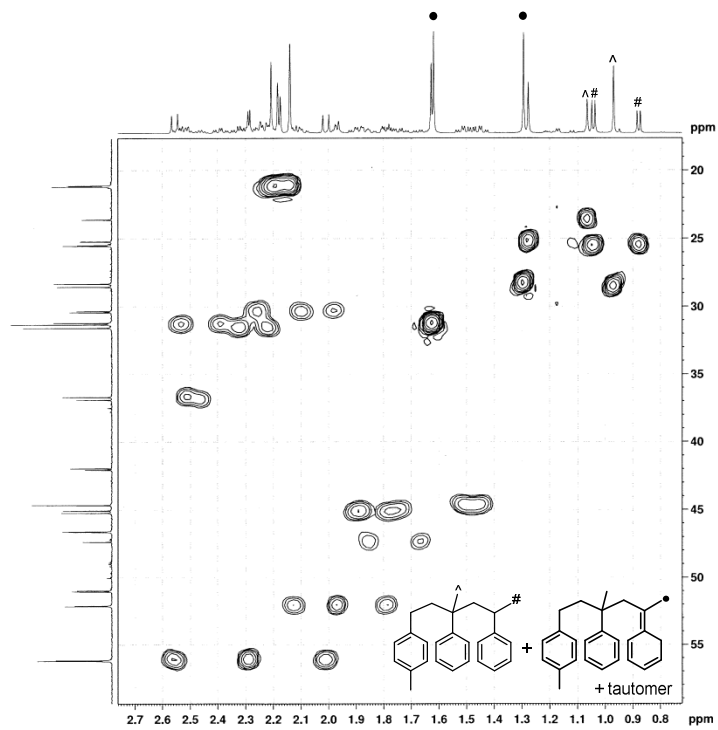

< $^{13}\text{C}$  DEFT NMR spectra of the protonated compound of 1:2 adduct  $\text{MeC}_6\text{H}_4\text{CH}_2\text{-CH}_2\text{C(Ph)(Me)-CH}_2\text{C(Ph)(Me)Li}$ >

“1” signals for primary carbon; “2” signals for secondary carbon; “3” signals for tertiary carbon; “4” signals for quaternary carbon

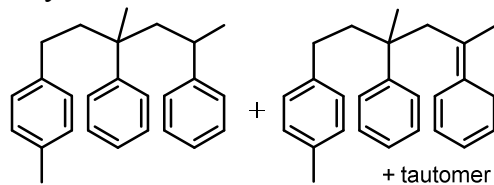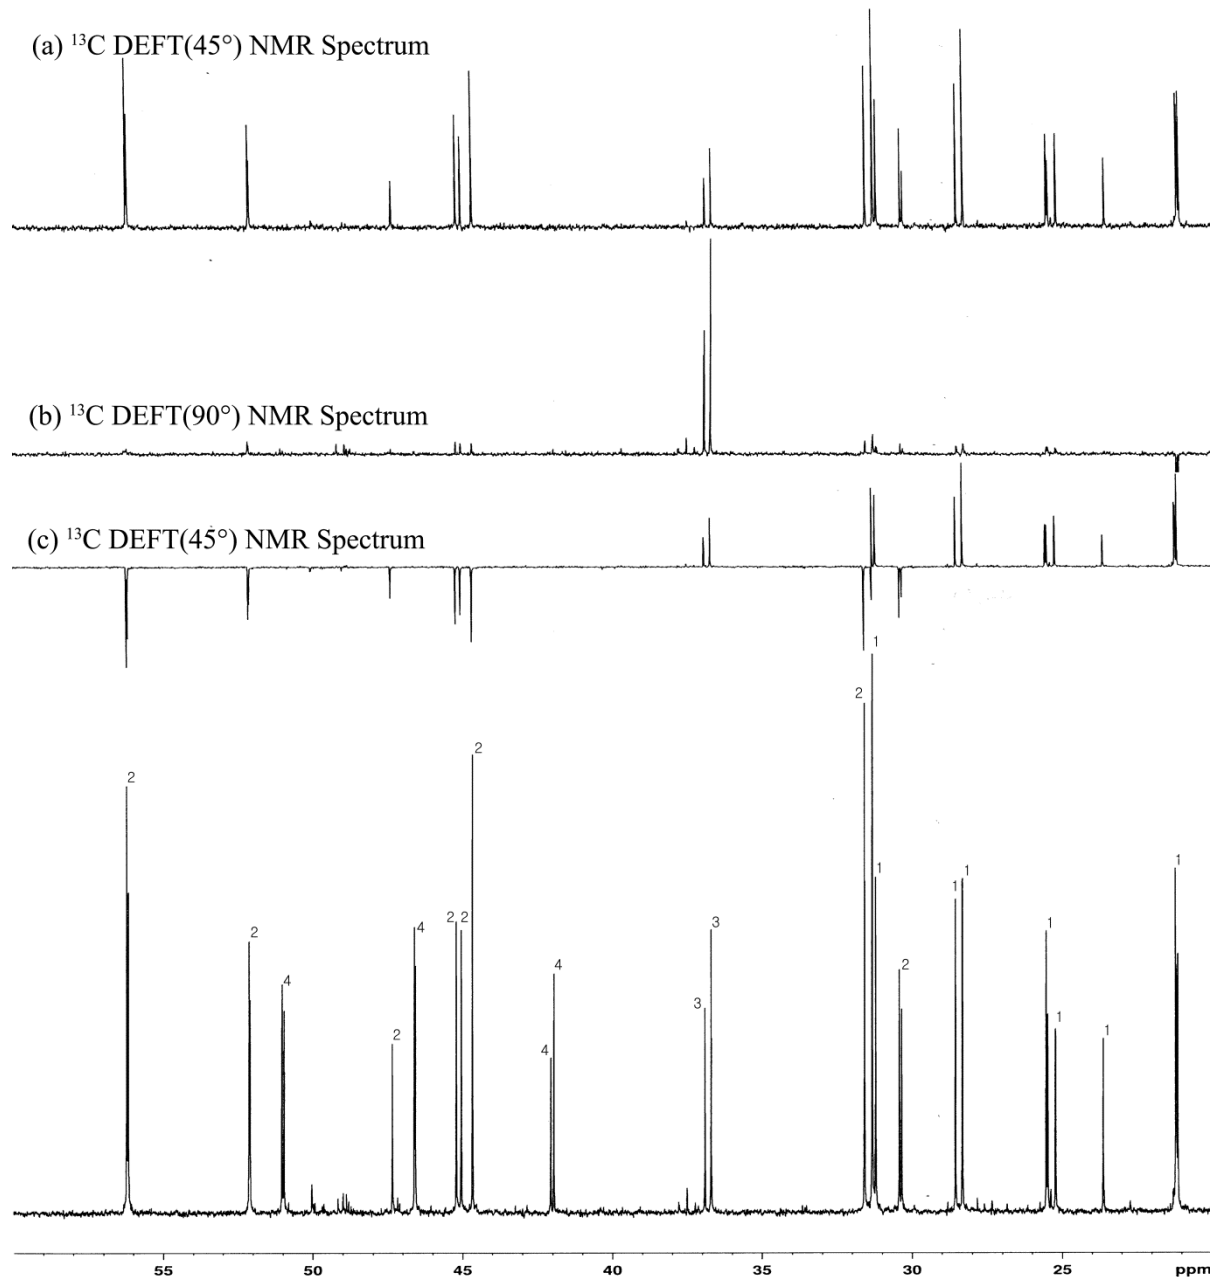



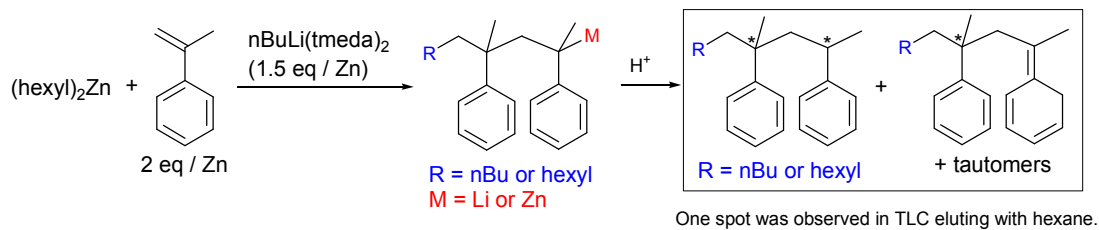

<Mass spectrum of the protonated compound of 1:2 adduct nBu(or hexyl)-CH<sub>2</sub>C(Ph)(Me)-CH<sub>2</sub>C(Ph)(Me)Li>

HRMS (EI):  $m/z$  calcd ( $[\text{M}]^+$  C<sub>22</sub>H<sub>30</sub> (nBu-CH<sub>2</sub>C(Ph)(Me)-CH<sub>2</sub>C(Ph)(Me))) 294.2348. Found: 294.2345.

HRMS (EI):  $m/z$  calcd ( $[\text{M}]^+$  C<sub>24</sub>H<sub>34</sub> (hexyl-CH<sub>2</sub>C(Ph)(Me)-CH<sub>2</sub>C(Ph)(Me))) 322.2661. Found: 322.2663.

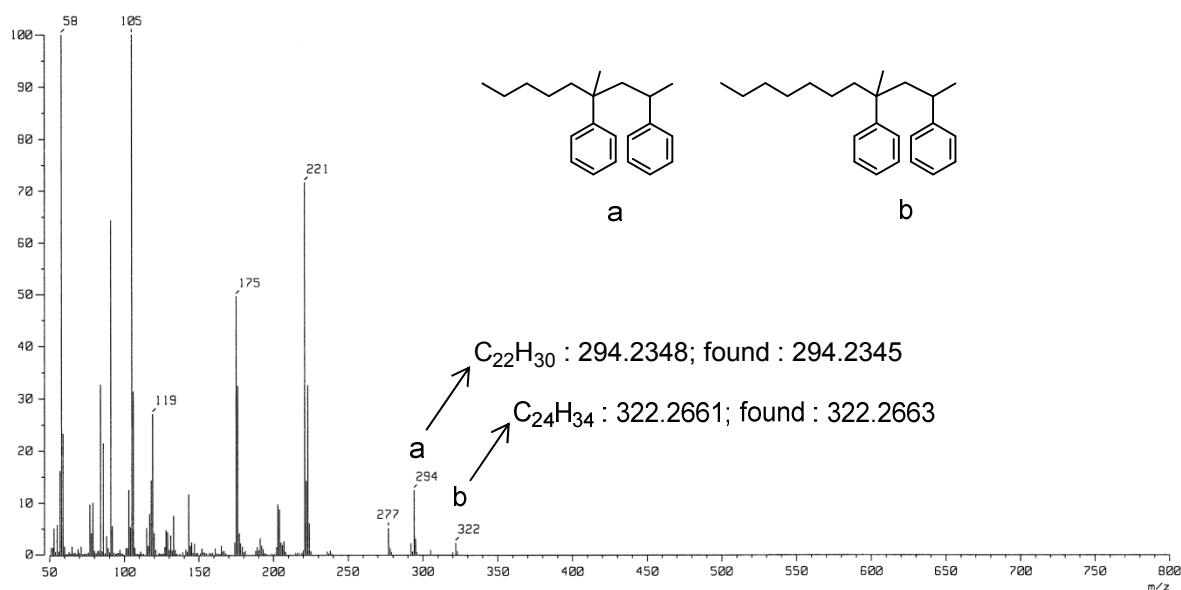

<<sup>1</sup>H NMR spectrum of the protonated compound of 1:2 adduct nBu(or hexyl)-CH<sub>2</sub>C(Ph)(Me)-CH<sub>2</sub>C(Ph)(Me)Li>

The upper spectrum was measured in C<sub>6</sub>D<sub>6</sub> while the lower one measured in CDCl<sub>3</sub>.

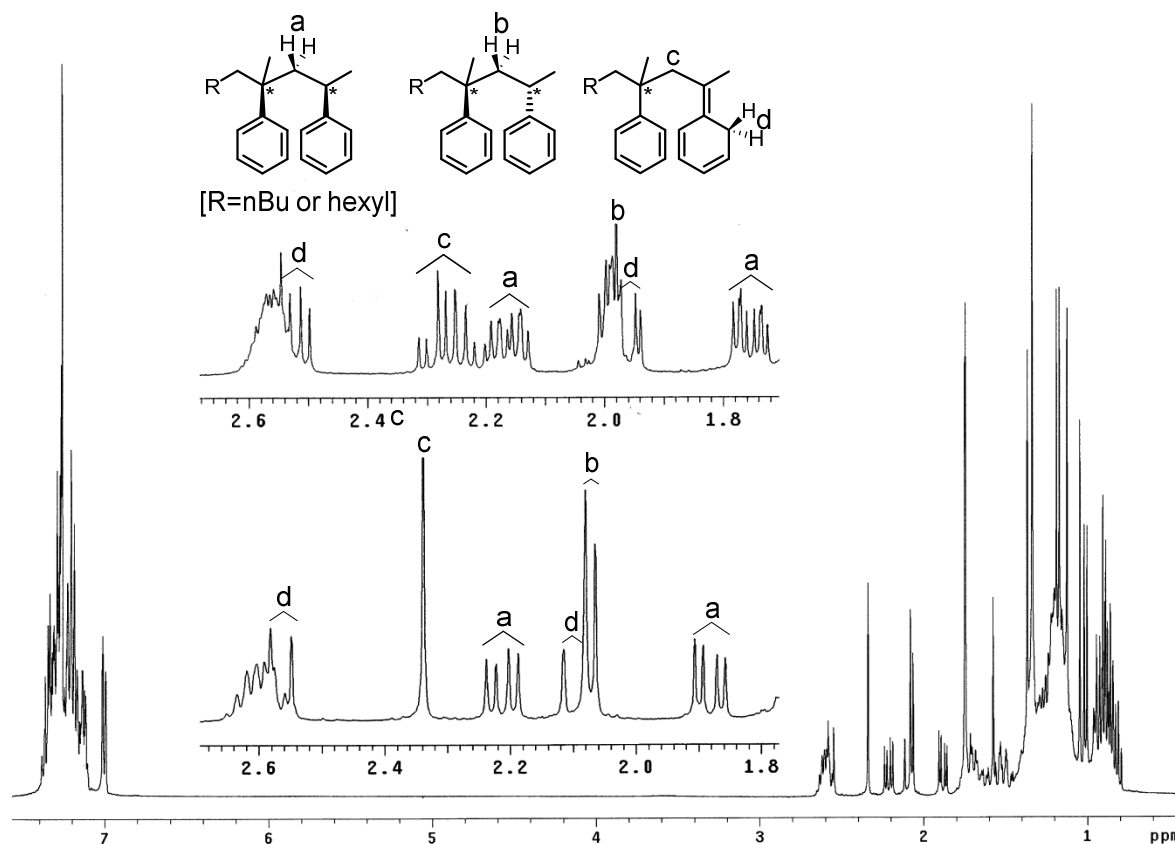

<<sup>13</sup>C NMR spectrum of the protonated compound of 1:2 adduct nBu(or hexyl)-CH<sub>2</sub>C(Ph)(Me)-CH<sub>2</sub>C(Ph)(Me)Li>

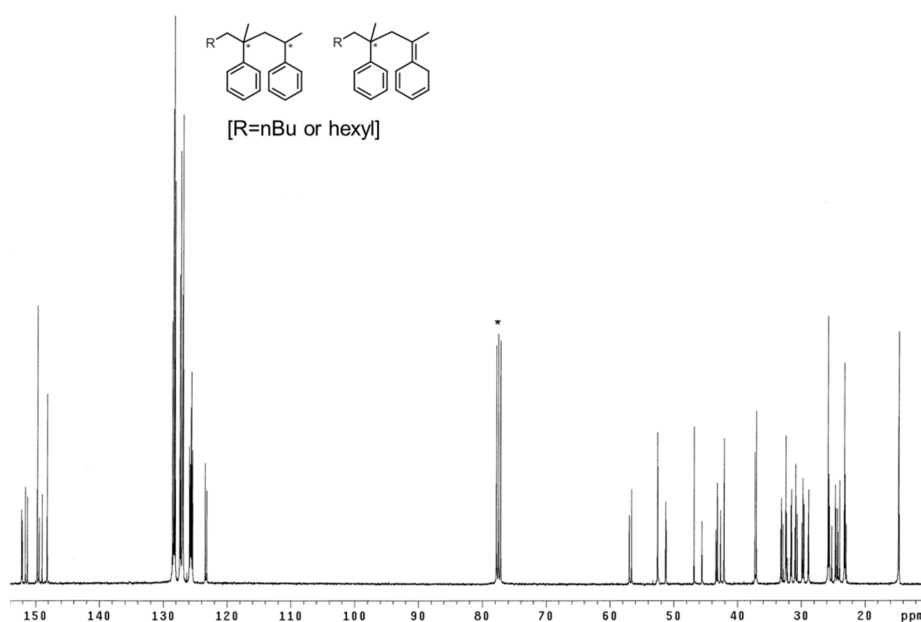

<GPC curves for PO and PS samples showing that the RI detector response is opposite>  
Weight concentration is the same for each.

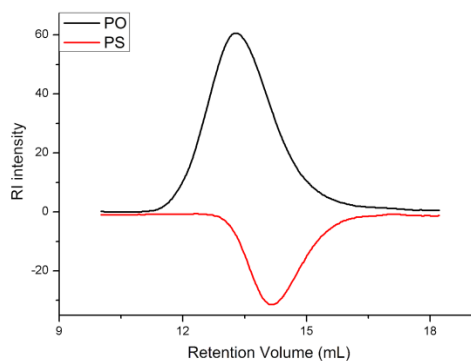

<GPC curves for samples before and after the anionic styrene polymerization>

<Entry 1 in table 2;  $M_w$  129,000  $\Rightarrow$  143,000>

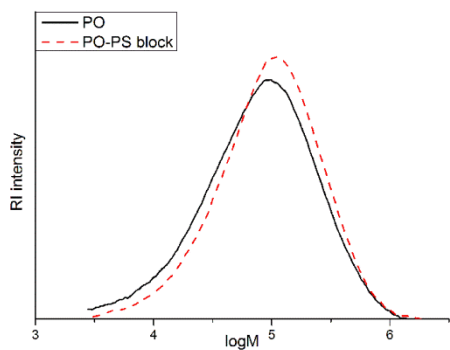

<Entry 1 in table 2;  $M_w$  135,000  $\Rightarrow$  150,000>

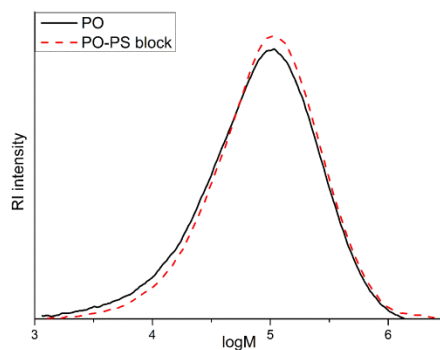

<Entry 3 in table 2;  $M_w$  115,000  $\Rightarrow$  145,000>

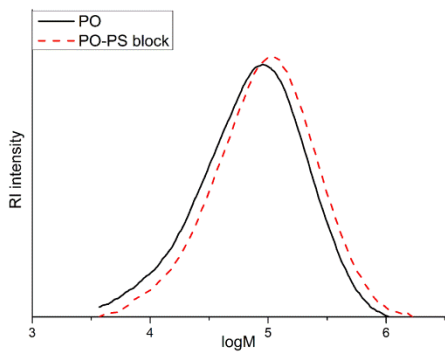

<Entry 4 in table 2;  $M_w$  140,000  $\Rightarrow$  148,000>

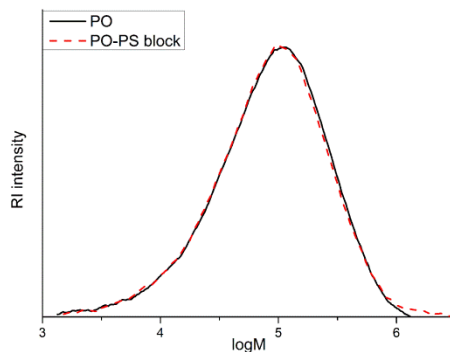

<Entry 5 in table 2;  $M_w$  134,000 => 155,000>

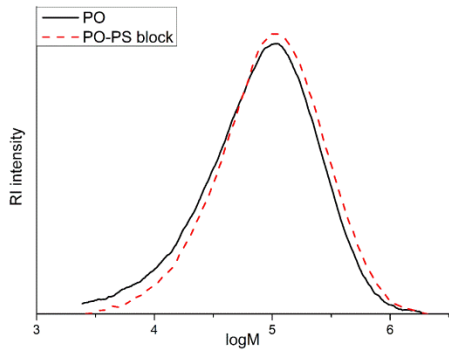

<Entry 6 in table 2;  $M_w$  133,000 => 138,000>

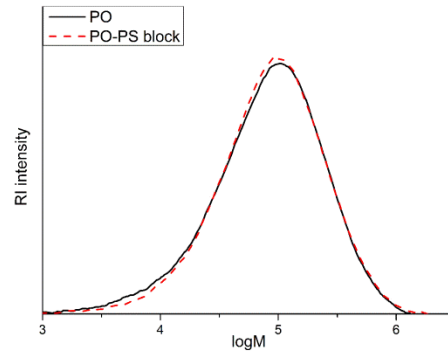

<Entry 7 in table 2;  $M_w$  142,000 => 154,000>

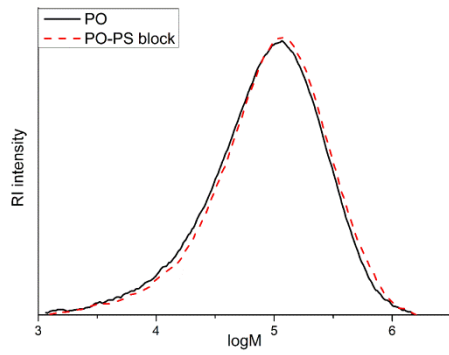

<Entry 8 in table 2;  $M_w$  147,000 => 162,000>

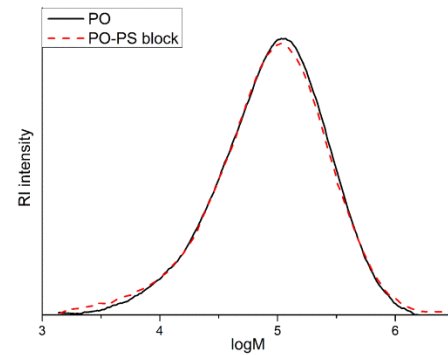

<Entry 9 in table 2;  $M_w$  132,000 => 157,000>

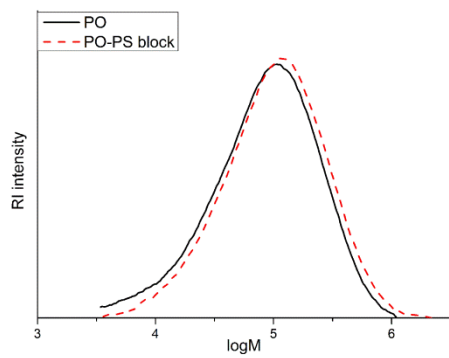

<Entry 10 in table 2;  $M_w$  136,000 => 146,000>

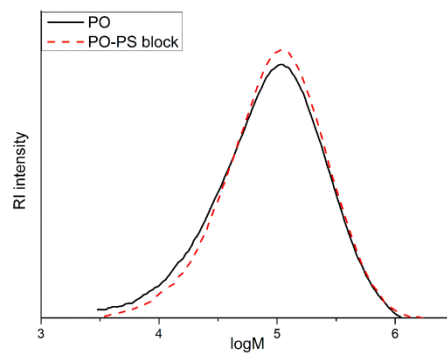

<Entry 11 in table 2;  $M_w$  130,000 => 155,000>

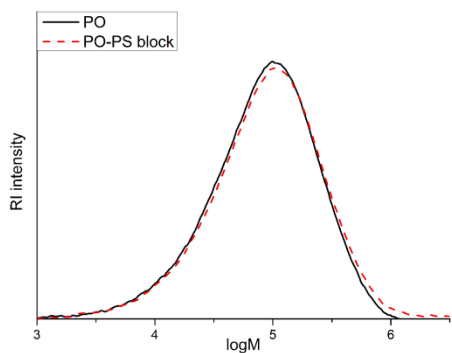

<Entry 12 in table 2;  $M_w$  119,000 => 134,000>

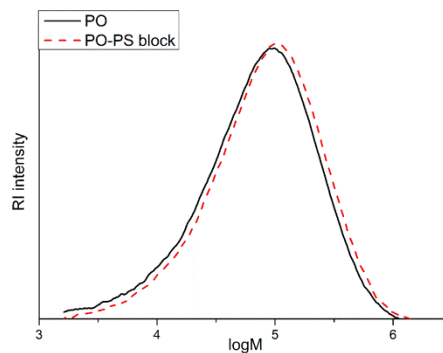

<Entry 13 in table 2;  $M_w$  126,000 => 140,000>

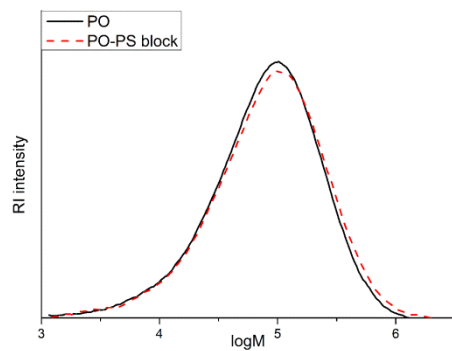

<Entry 14 in table 2;  $M_w$  129,000 => 153,000>

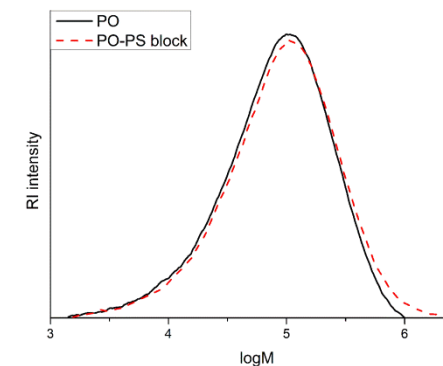

<DSC thermogram for the isolated PO-PS multiblock copolymers>

<Entry 1 in Table 2>

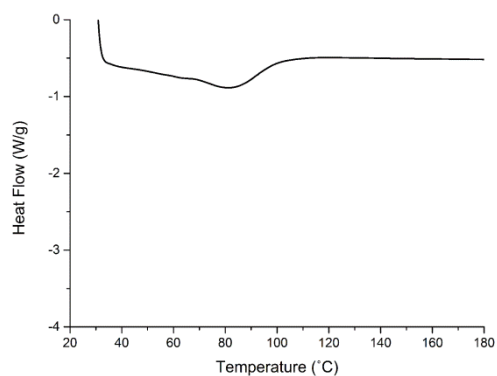

<Entry 1 in Table 2>

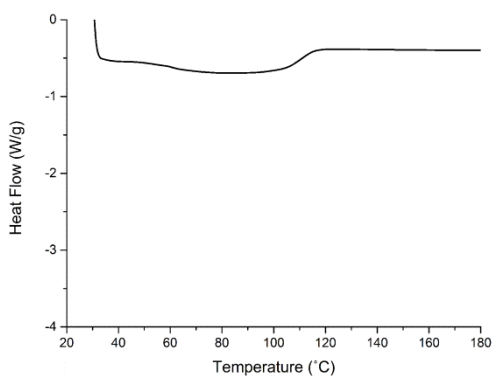

<Entry 3 in Table 2>

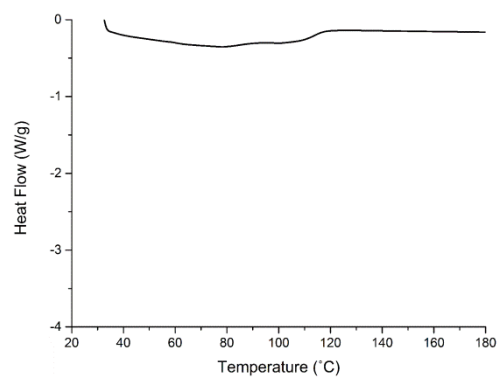

<Entry 4 in Table 2>

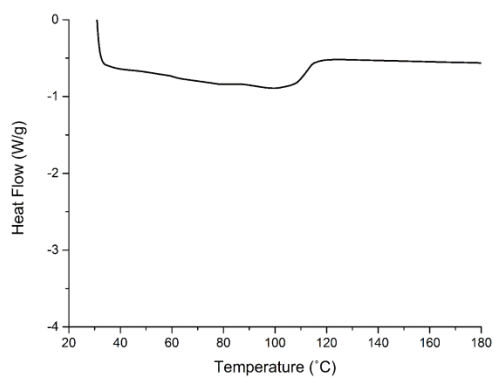

<Entry 5 in Table 2>

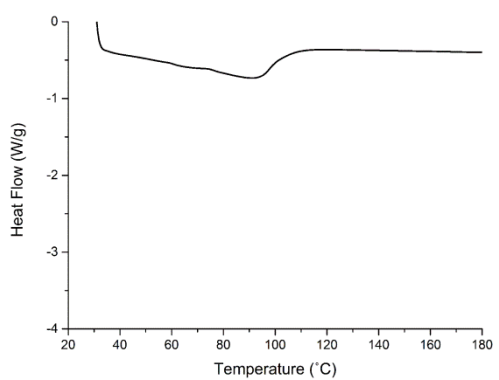

<Entry 8 in Table 2>

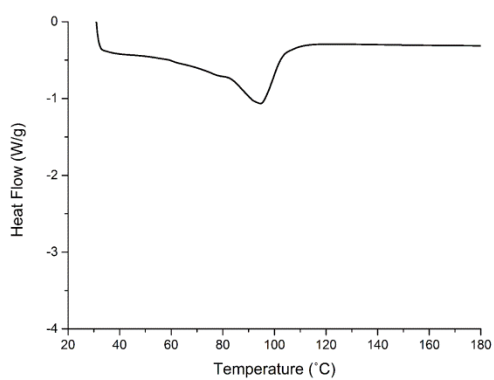

<Entry 9 in Table 2>

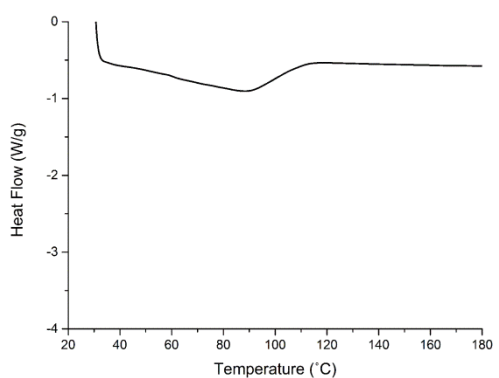

<Entry 10 in Table 2>

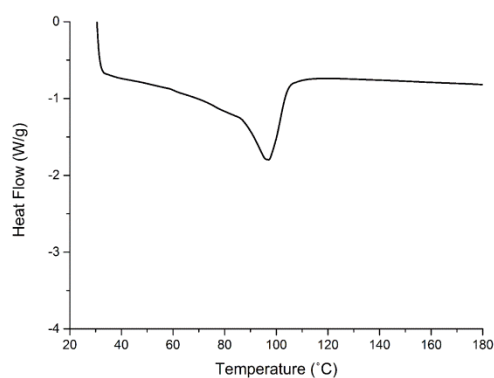

<Entry 11 in Table 2>

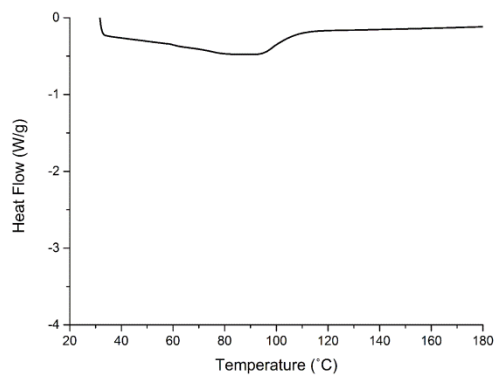

<Entry 12 in Table 2>

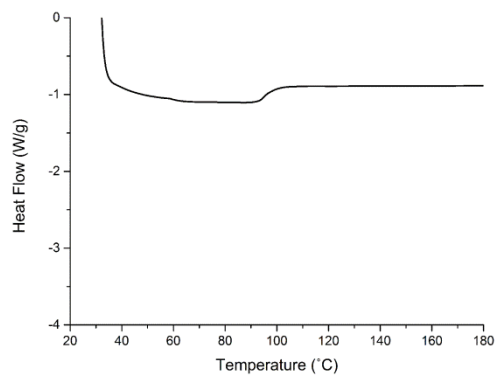

<Entry 13 in Table 2>

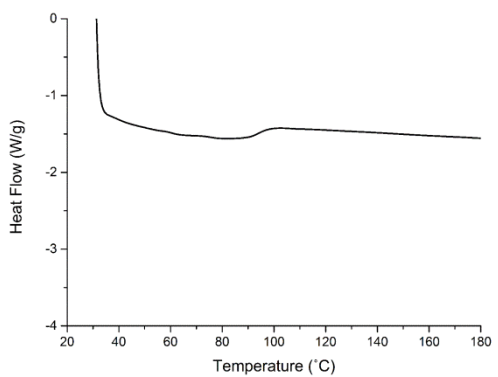

<Entry 14 in Table 2>

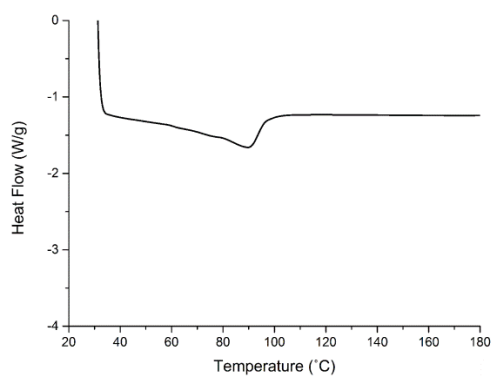

Supplement: c6ra25848d1.pdf [file c6ra25848d1.pdf]
